# Supplementary material for: circTADA2As suppress breast cancer progression and metastasis via targeting miR-203a-3p/SOCS3 axis
Source: PubMed Central journal article supplement (PMC6382814; doi:10.1038/s41419-019-1382-y), 2019-02-20
Supplement: 41419_2019_1382_MOESM3_ESM.pdf [file 41419_2019_1382_MOESM3_ESM.pdf]

Table S1 Patient and healthy adult information for the circRNA microarray study

| No. | Molecular status | Age | Ethic       | Clinical Stage                                     |
|-----|------------------|-----|-------------|----------------------------------------------------|
| 1   | Health adult     | 42  | Chinese Han |                                                    |
| 2   | Health adult     | 47  | Chinese Han |                                                    |
| 3   | Health adult     | 37  | Chinese Han |                                                    |
| 4   | LA               | 42  | Chinese Han | pT <sub>2</sub> N <sub>1</sub> M <sub>0</sub> II b |
| 5   | LA               | 43  | Chinese Han | pT <sub>2</sub> N <sub>0</sub> M <sub>0</sub> II a |
| 6   | LA               | 72  | Chinese Han | pT <sub>2</sub> N <sub>1</sub> M <sub>0</sub> II b |
| 7   | LA               | 55  | Chinese Han | pT <sub>2</sub> N <sub>0</sub> M <sub>0</sub> II a |
| 8   | TNBC             | 62  | Chinese Han | pT <sub>2</sub> N <sub>1</sub> M <sub>0</sub> II b |
| 9   | TNBC             | 50  | Chinese Han | pT <sub>1</sub> N <sub>0</sub> M <sub>0</sub> I a  |
| 10  | TNBC             | 38  | Chinese Han | pT <sub>2</sub> N <sub>0</sub> M <sub>0</sub> II a |
| 11  | TNBC             | 52  | Chinese Han | pT <sub>1</sub> N <sub>0</sub> M <sub>0</sub> I a  |

**Table S2. Differentially-expressed circRNAs in TNBC as compared to normal mammary gland tissues**

| Probe ID    | circRNA_type | Chromosome | FC (abs) | Regulation | Gene Symbol |
|-------------|--------------|------------|----------|------------|-------------|
| ASCRP000048 | intronic     | chr6       | 2.297    | up         | BACH2       |
| ASCRP000086 | antisense    | chr18      | 2.383    | up         | DLGAP1      |
| ASCRP000137 | intragenic   | chr15      | 2.160    | up         | EDC3        |
| ASCRP000156 | intragenic   | chr3       | 1.592    | up         | TRA2B       |
| ASCRP000232 | antisense    | chr12      | 1.617    | up         | EP400NL     |
| ASCRP000259 | antisense    | chr14      | 3.124    | up         | RPPH1       |
| ASCRP000262 | antisense    | chr15      | 1.806    | up         | TLE3        |
| ASCRP000269 | intronic     | chr22      | 1.865    | up         | DGCR8       |
| ASCRP000315 | intragenic   | chr14      | 5.790    | up         | RPPH1       |
| ASCRP000334 | intronic     | chr6       | 1.912    | up         | ARID1B      |
| ASCRP000343 | intragenic   | chr14      | 11.225   | up         | RPPH1       |
| ASCRP000354 | intronic     | chr11      | 2.115    | up         | OSBPL5      |
| ASCRP000360 | intragenic   | chr9       | 1.584    | up         | SNORA43     |
| ASCRP000390 | intragenic   | chr14      | 3.252    | up         | RPPH1       |
| ASCRP000421 | exonic       | chr1       | 1.715    | up         | RERE        |
| ASCRP000574 | exonic       | chr1       | 1.517    | up         | SCMH1       |
| ASCRP000601 | exonic       | chr1       | 2.097    | up         | STIL        |
| ASCRP000657 | exonic       | chr1       | 2.383    | up         | LPHN2       |
| ASCRP000760 | exonic       | chr1       | 2.732    | up         | UCK2        |
| ASCRP000791 | exonic       | chr1       | 1.584    | up         | ABL2        |
| ASCRP000808 | exonic       | chr1       | 1.876    | up         | IPO9        |
| ASCRP000823 | exonic       | chr1       | 2.219    | up         | KCNH1       |
| ASCRP000837 | exonic       | chr1       | 2.078    | up         | PTPN14      |
| ASCRP000910 | exonic       | chr10      | 1.803    | up         | WDR37       |
| ASCRP000958 | exonic       | chr10      | 3.615    | up         | WAC         |
| ASCRP000961 | exonic       | chr10      | 1.733    | up         | ARHGAP12    |
| ASCRP001003 | exonic       | chr10      | 1.928    | up         | KAT6B       |
| ASCRP001004 | exonic       | chr10      | 1.723    | up         | KAT6B       |
| ASCRP001052 | exonic       | chr10      | 1.793    | up         | PCGF6       |
| ASCRP001174 | exonic       | chr11      | 1.631    | up         | TTC17       |
| ASCRP001179 | exonic       | chr11      | 1.784    | up         | AMBRA1      |
| ASCRP001226 | exonic       | chr11      | 1.817    | up         | DPP3        |
| ASCRP001229 | exonic       | chr11      | 1.603    | up         | C11orf80    |
| ASCRP001234 | exonic       | chr11      | 1.539    | up         | LRP5        |
| ASCRP001248 | exonic       | chr11      | 1.917    | up         | NADSYN1     |
| ASCRP001353 | exonic       | chr11      | 2.047    | up         | STT3A       |
| ASCRP001380 | exonic       | chr12      | 2.508    | up         | A2ML1       |
| ASCRP001429 | exonic       | chr12      | 2.151    | up         | LETMD1      |
| ASCRP001523 | exonic       | chr12      | 1.867    | up         | SLC24A6     |
| ASCRP001596 | exonic       | chr13      | 4.570    | up         | TNFRSF19    |
| ASCRP001668 | exonic       | chr13      | 1.597    | up         | TMCO3       |
| ASCRP001705 | exonic       | chr14      | 2.382    | up         | SEC23A      |
| ASCRP001809 | exonic       | chr15      | 1.907    | up         | HERC2P3     |
| ASCRP002054 | exonic       | chr16      | 1.927    | up         | RSL1D1      |
| ASCRP002090 | exonic       | chr16      | 3.231    | up         | C16orf62    |
| ASCRP002094 | exonic       | chr16      | 2.380    | up         | C16orf62    |
| ASCRP002126 | exonic       | chr16      | 1.783    | up         | XPO6        |
| ASCRP002171 | exonic       | chr16      | 2.069    | up         | CBFB        |
| ASCRP002179 | exonic       | chr16      | 2.209    | up         | NFATC3      |
| ASCRP002212 | exonic       | chr16      | 1.667    | up         | IST1        |
| ASCRP002309 | exonic       | chr17      | 2.370    | up         | NEURL4      |
| ASCRP002311 | exonic       | chr17      | 1.744    | up         | NEURL4      |
| ASCRP002354 | exonic       | chr17      | 1.964    | up         | SSH2        |
| ASCRP002369 | exonic       | chr17      | 1.893    | up         | RHOT1       |
| ASCRP002394 | exonic       | chr17      | 1.528    | up         | MED1        |
| ASCRP002404 | exonic       | chr17      | 1.602    | up         | NT5C3L      |
| ASCRP002431 | exonic       | chr17      | 2.310    | up         | KIAA1267    |
| ASCRP002438 | exonic       | chr17      | 1.622    | up         | NPEPPS      |
| ASCRP002472 | exonic       | chr17      | 1.790    | up         | USP32       |
| ASCRP002524 | exonic       | chr17      | 1.627    | up         | FBF1        |
| ASCRP002539 | exonic       | chr17      | 2.160    | up         | PGS1        |
| ASCRP002557 | exonic       | chr17      | 1.695    | up         | NPLOC4      |
| ASCRP002561 | exonic       | chr17      | 1.570    | up         | ASPSCR1     |

|             |            |       |       |      |          |
|-------------|------------|-------|-------|------|----------|
| ASCRP002611 | exonic     | chr18 | 1.761 | up   | PTPRM    |
| ASCRP002644 | exonic     | chr18 | 2.118 | up   | C18orf8  |
| ASCRP002652 | exonic     | chr18 | 2.981 | up   | ZNF521   |
| ASCRP002734 | exonic     | chr19 | 2.099 | up   | MAP2K2   |
| ASCRP002770 | exonic     | chr19 | 1.816 | up   | LDLR     |
| ASCRP002800 | exonic     | chr19 | 2.608 | up   | PGLS     |
| ASCRP002854 | exonic     | chr19 | 2.245 | up   | RYR1     |
| ASCRP002876 | exonic     | chr19 | 1.636 | up   | GRIK5    |
| ASCRP003019 | exonic     | chr2  | 1.904 | up   | THADA    |
| ASCRP003066 | exonic     | chr2  | 1.604 | up   | GFPT1    |
| ASCRP003071 | exonic     | chr2  | 1.981 | up   | CYP26B1  |
| ASCRP003104 | exonic     | chr2  | 1.622 | up   | UXS1     |
| ASCRP003147 | exonic     | chr2  | 1.723 | up   | TANK     |
| ASCRP003197 | exonic     | chr2  | 1.506 | up   | SATB2    |
| ASCRP003232 | exonic     | chr2  | 2.248 | up   | SERPINE2 |
| ASCRP003255 | exonic     | chr2  | 2.499 | up   | INPP5D   |
| ASCRP003261 | exonic     | chr2  | 1.670 | up   | UBE2F    |
| ASCRP003426 | exonic     | chr21 | 1.591 | up   | DONSON   |
| ASCRP003439 | exonic     | chr21 | 1.768 | up   | BACE2    |
| ASCRP003472 | exonic     | chr22 | 1.517 | up   | MAPK1    |
| ASCRP003562 | exonic     | chr22 | 1.629 | up   | TBC1D22A |
| ASCRP003620 | exonic     | chr3  | 2.129 | up   | CLASP2   |
| ASCRP003650 | exonic     | chr3  | 1.542 | up   | SCAP     |
| ASCRP003669 | exonic     | chr3  | 2.389 | up   | CDC25A   |
| ASCRP003679 | exonic     | chr3  | 1.528 | up   | RBM5     |
| ASCRP003746 | exonic     | chr3  | 1.876 | up   | PDIA5    |
| ASCRP003753 | exonic     | chr3  | 1.502 | up   | ZNF148   |
| ASCRP003849 | exonic     | chr3  | 2.006 | up   | XXYL1    |
| ASCRP003922 | exonic     | chr4  | 1.668 | up   | APBB2    |
| ASCRP004044 | exonic     | chr4  | 3.231 | up   | LRBA     |
| ASCRP004102 | exonic     | chr5  | 2.182 | up   | NUP155   |
| ASCRP004124 | exonic     | chr5  | 1.523 | up   | PARP8    |
| ASCRP004150 | exonic     | chr5  | 1.767 | up   | CCNB1    |
| ASCRP004184 | exonic     | chr5  | 1.636 | up   | MSH3     |
| ASCRP004196 | exonic     | chr5  | 1.620 | up   | MCTP1    |
| ASCRP004228 | exonic     | chr5  | 2.796 | up   | SEC24A   |
| ASCRP004277 | exonic     | chr5  | 1.820 | up   | EBF1     |
| ASCRP004379 | exonic     | chr6  | 1.788 | up   | TRERF1   |
| ASCRP004465 | exonic     | chr6  | 1.778 | up   | AHI1     |
| ASCRP004480 | exonic     | chr6  | 1.934 | up   | STXBP5   |
| ASCRP004502 | exonic     | chr6  | 2.498 | up   | IPCEF1   |
| ASCRP004599 | exonic     | chr7  | 2.460 | up   | HIBADH   |
| ASCRP004647 | exonic     | chr7  | 1.998 | up   | WBSCR17  |
| ASCRP004753 | exonic     | chr7  | 2.550 | up   | CREB3L2  |
| ASCRP005008 | exonic     | chr9  | 1.538 | up   | UBAP2    |
| ASCRP005012 | exonic     | chr9  | 1.701 | up   | UBAP2    |
| ASCRP005085 | exonic     | chr9  | 1.762 | up   | CDC14B   |
| ASCRP005086 | exonic     | chr9  | 1.615 | up   | CDC14B   |
| ASCRP005129 | exonic     | chr9  | 2.161 | up   | HSDL2    |
| ASCRP005132 | exonic     | chr9  | 1.622 | up   | SLC31A1  |
| ASCRP005179 | exonic     | chr9  | 1.748 | up   | SPTAN1   |
| ASCRP005187 | exonic     | chr9  | 2.320 | up   | NUP214   |
| ASCRP005240 | exonic     | chrX  | 2.604 | up   | CASK     |
| ASCRP005274 | exonic     | chrX  | 1.998 | up   | SLC25A43 |
| ASCRP005286 | exonic     | chrX  | 1.758 | up   | FLNA     |
| ASCRP005304 | intronic   | chr1  | 1.870 | up   | RPS8     |
| ASCRP005307 | intronic   | chr1  | 2.262 | up   | GADD45A  |
| ASCRP005324 | intronic   | chr16 | 1.924 | up   | ANKS3    |
| ASCRP005364 | intronic   | chr22 | 1.738 | up   | MCM5     |
| ASCRP000064 | intronic   | chr12 | 3.654 | down | PRB4     |
| ASCRP000075 | antisense  | chr15 | 1.556 | down | KLF13    |
| ASCRP000085 | intronic   | chr17 | 2.116 | down | KIF18B   |
| ASCRP000161 | intronic   | chr5  | 1.847 | down | C5orf56  |
| ASCRP000199 | antisense  | chr19 | 2.437 | down | RPS15    |
| ASCRP000212 | antisense  | chr4  | 5.275 | down | MARCH1   |
| ASCRP000266 | intragenic | chr19 | 2.451 | down | C19orf18 |
| ASCRP000493 | exonic     | chr1  | 1.728 | down | CEP85    |
| ASCRP000594 | exonic     | chr1  | 1.789 | down | GPBP1L1  |

|             |        |       |        |      |           |
|-------------|--------|-------|--------|------|-----------|
| ASCRP000661 | exonic | chr1  | 2.122  | down | RPAP2     |
| ASCRP000741 | exonic | chr1  | 2.677  | down | GON4L     |
| ASCRP000745 | exonic | chr1  | 1.811  | down | KIAA0907  |
| ASCRP000775 | exonic | chr1  | 1.530  | down | PRRC2C    |
| ASCRP000818 | exonic | chr1  | 2.436  | down | DSTYK     |
| ASCRP000906 | exonic | chr10 | 2.033  | down | WDR37     |
| ASCRP000987 | exonic | chr10 | 2.218  | down | DDX21     |
| ASCRP001008 | exonic | chr10 | 1.558  | down | DLG5      |
| ASCRP001059 | exonic | chr10 | 4.007  | down | FAM160B1  |
| ASCRP001087 | exonic | chr10 | 1.639  | down | ZRANB1    |
| ASCRP001144 | exonic | chr11 | 1.553  | down | ANO5      |
| ASCRP001219 | exonic | chr11 | 1.516  | down | MARK2     |
| ASCRP001241 | exonic | chr11 | 2.664  | down | CPT1A     |
| ASCRP001277 | exonic | chr11 | 1.800  | down | ALG8      |
| ASCRP001334 | exonic | chr11 | 2.013  | down | ARCN1     |
| ASCRP001375 | exonic | chr12 | 2.525  | down | IFFO1     |
| ASCRP001384 | exonic | chr12 | 1.952  | down | LRP6      |
| ASCRP001410 | exonic | chr12 | 2.593  | down | DENND5B   |
| ASCRP001430 | exonic | chr12 | 2.654  | down | CSRNP2    |
| ASCRP001446 | exonic | chr12 | 1.614  | down | CS        |
| ASCRP001538 | exonic | chr12 | 2.563  | down | RNF10     |
| ASCRP001569 | exonic | chr12 | 1.755  | down | AACS      |
| ASCRP001620 | exonic | chr13 | 2.302  | down | KIAA0564  |
| ASCRP001667 | exonic | chr13 | 2.653  | down | TMCO3     |
| ASCRP001740 | exonic | chr14 | 4.279  | down | PCNX      |
| ASCRP001893 | exonic | chr15 | 2.748  | down | ANXA2     |
| ASCRP002064 | exonic | chr16 | 1.859  | down | ABCC1     |
| ASCRP002069 | exonic | chr16 | 1.737  | down | ABCC1     |
| ASCRP002384 | exonic | chr17 | 29.629 | down | TADA2A    |
| ASCRP002386 | exonic | chr17 | 19.698 | down | TADA2A    |
| ASCRP002434 | exonic | chr17 | 1.953  | down | CDC27     |
| ASCRP002523 | exonic | chr17 | 1.561  | down | UNK       |
| ASCRP002556 | exonic | chr17 | 1.845  | down | NPLOC4    |
| ASCRP002757 | exonic | chr19 | 1.725  | down | DNMT1     |
| ASCRP002758 | exonic | chr19 | 1.922  | down | DNMT1     |
| ASCRP002932 | exonic | chr2  | 23.180 | down | NOL10     |
| ASCRP002964 | exonic | chr2  | 5.719  | down | ZNF512    |
| ASCRP003001 | exonic | chr2  | 2.627  | down | CRIM1     |
| ASCRP003002 | exonic | chr2  | 2.840  | down | STRN      |
| ASCRP003092 | exonic | chr2  | 1.962  | down | LOC285033 |
| ASCRP003107 | exonic | chr2  | 1.995  | down | SEPT10    |
| ASCRP003189 | exonic | chr2  | 2.449  | down | HECW2     |
| ASCRP003236 | exonic | chr2  | 1.825  | down | RHBDD1    |
| ASCRP003290 | exonic | chr20 | 3.447  | down | PTPRA     |
| ASCRP003424 | exonic | chr21 | 1.622  | down | IFNGR2    |
| ASCRP003468 | exonic | chr22 | 1.541  | down | UBE2L3    |
| ASCRP003491 | exonic | chr22 | 1.525  | down | EWSR1     |
| ASCRP003569 | exonic | chr22 | 1.590  | down | RABL2B    |
| ASCRP003607 | exonic | chr3  | 2.112  | down | RBMS3     |
| ASCRP003643 | exonic | chr3  | 8.013  | down | SETD2     |
| ASCRP003686 | exonic | chr3  | 1.578  | down | ACY1      |
| ASCRP003776 | exonic | chr3  | 1.514  | down | IL20RB    |
| ASCRP003872 | exonic | chr3  | 2.069  | down | LRCH3     |
| ASCRP003973 | exonic | chr4  | 1.587  | down | SEC31A    |
| ASCRP003994 | exonic | chr4  | 1.847  | down | HERC5     |
| ASCRP004073 | exonic | chr5  | 2.938  | down | NSUN2     |
| ASCRP004108 | exonic | chr5  | 1.741  | down | NUP155    |
| ASCRP004135 | exonic | chr5  | 2.121  | down | DEPDC1B   |
| ASCRP004219 | exonic | chr5  | 1.908  | down | VDAC1     |
| ASCRP004255 | exonic | chr5  | 1.649  | down | DIAPH1    |
| ASCRP004315 | exonic | chr6  | 1.512  | down | DUSP22    |
| ASCRP004360 | exonic | chr6  | 2.588  | down | LRRC16A   |
| ASCRP004467 | exonic | chr6  | 1.650  | down | PDE7B     |
| ASCRP004489 | exonic | chr6  | 1.571  | down | LATS1     |
| ASCRP004503 | exonic | chr6  | 2.204  | down | IPCEF1    |
| ASCRP004532 | exonic | chr6  | 1.819  | down | MAP3K4    |
| ASCRP004534 | exonic | chr6  | 1.575  | down | MAP3K4    |
| ASCRP004576 | exonic | chr7  | 2.397  | down | PHF14     |

|             |          |       |       |      |          |
|-------------|----------|-------|-------|------|----------|
| ASCRP004595 | exonic   | chr7  | 1.716 | down | MPP6     |
| ASCRP004736 | exonic   | chr7  | 1.540 | down | NRF1     |
| ASCRP004813 | exonic   | chr8  | 1.596 | down | VPS37A   |
| ASCRP004906 | exonic   | chr8  | 4.349 | down | PTDSS1   |
| ASCRP004947 | exonic   | chr8  | 1.762 | down | TRAPPC9  |
| ASCRP005005 | exonic   | chr9  | 1.575 | down | UBAP2    |
| ASCRP005047 | exonic   | chr9  | 1.895 | down | TLE4     |
| ASCRP005049 | exonic   | chr9  | 2.703 | down | TLE4     |
| ASCRP005164 | exonic   | chr9  | 1.745 | down | NEK6     |
| ASCRP005171 | exonic   | chr9  | 2.145 | down | FAM125B  |
| ASCRP005302 | intronic | chr1  | 1.934 | down | SNHG12   |
| ASCRP005355 | intronic | chr20 | 1.583 | down | NINL     |
| ASCRP005370 | intronic | chr3  | 1.886 | down | NISCH    |
| ASCRP005383 | intronic | chr6  | 2.062 | down | C6orf132 |
| ASCRP005384 | intronic | chr6  | 1.754 | down | TJAP1    |
| ASCRP005396 | intronic | chrX  | 1.502 | down | RPS4X    |

---

**Table S3. Validation list of eight downregulated circRNAs in TNBC from microarray data**

| Gene Symbol of circRNA origination | Location        | Chrome | Size (bp) | Ratio (folds, down) |
|------------------------------------|-----------------|--------|-----------|---------------------|
| TADA2A                             | exonic 5 plus 6 | chr17  | 250       | 29.62               |
| NOL10                              | exonic          | chr12  | 562       | 23.17               |
| TADA2A                             | exonic 6        | Chr17  | 158       | 19.69               |
| NSUN2                              | exonic          | Chr5   | 178       | 2.94                |
| CSRNP2                             | exonic          | Chr12  | 260       | 2.65                |
| FAM125B                            | exonic          | Chr9   | 581       | 2.14                |
| CDC27                              | exonic          | Chr17  | 843       | 1.95                |
| ABCC1                              | exonic          | Chr16  | 567       | 1.85                |

**Table S4. Correlations between clinicopathological factors and circTADA2A-E5/E6 expression (  $2^{-\Delta\Delta Ct}$  ) in TNBC**

| Characteristics                | No.of patients (%) | Mean $\pm$ SEM          | <i>p</i> value |
|--------------------------------|--------------------|-------------------------|----------------|
| Age                            |                    |                         |                |
| $\geq 50$                      | 67 (58.3%)         | 0.94489 $\pm$ 0.23150   | 0.819          |
| <50                            | 48 (41.7%)         | 0.85775 $\pm$ 0.31123   |                |
| AJCC TNM stage <sup>#</sup>    |                    |                         |                |
| I - II                         | 82 (74.5%)         | 0.94605 $\pm$ 0.24210   | 0.660          |
| III - IV                       | 28 (25.5%)         | 0.75018 $\pm$ 0.26800   |                |
| T classification <sup>##</sup> |                    |                         |                |
| T <sub>1</sub>                 | 25 (24.0%)         | 0.48693 $\pm$ 0.16316   | 0.551          |
| T <sub>2</sub>                 | 70 (67.3%)         | 1.14613 $\pm$ 0.29297   |                |
| T <sub>3</sub>                 | 5 (4.8%)           | 0.57056 $\pm$ 0.0.22684 |                |
| T <sub>4</sub>                 | 4 (3.8%)           | 0.64002 $\pm$ 0.26530   |                |
| Lymphatic metastasis           |                    |                         |                |
| N <sub>0-1</sub>               | 91 (79.1%)         | 0.95593 $\pm$ 0.22138   | 0.623          |
| N <sub>2-3</sub>               | 24 (20.9%)         | 0.72874 $\pm$ 0.31091   |                |

AJCC, American Joint Committee on Cancer; #, 4.35% patient information missing; ##, 9.56% patient information missing ; \**p* < 0.05

**Table S5. Differentially-expressed circRNAs and target miRNAs**

| circRNA ID        | Target miRNAs    |                   |                   |                  |                   | Gene Symbol |
|-------------------|------------------|-------------------|-------------------|------------------|-------------------|-------------|
| hsa_circ_0001625  | hsa-miR-580-5p   | hsa-miR-139-3p    | hsa-miR-877-3p    | hsa-miR-603      | hsa-miR-541-5p    | BACH2       |
| hsa_circ_0000822  | hsa-miR-144-3p   | hsa-miR-545-3p    | hsa-miR-92a-2-5p  | hsa-miR-625-5p   | hsa-miR-18a-3p    | DLGAP1      |
| hsa_circ_0000632  | hsa-miR-765      | hsa-miR-744-3p    | hsa-miR-33b-3p    | hsa-miR-519e-3p  | hsa-miR-515-3p    | EDC3        |
| hsa_circ_0001373  | hsa-miR-218-5p   | hsa-miR-148b-5p   | hsa-miR-647       | hsa-miR-378a-5p  | hsa-miR-639       | TRA2B       |
| hsa_circ_0000463  | hsa-miR-627-5p   | hsa-miR-550a-5p   | hsa-miR-515-3p    | hsa-miR-499a-3p  | hsa-miR-550a-3-5p | EP400NL     |
| hsa_circ_0000516  | hsa-miR-18b-3p   | hsa-miR-670-5p    | hsa-miR-23a-5p    | hsa-miR-125a-3p  | hsa-miR-125b-5p   | RPPH1       |
| hsa_circ_0000622  | hsa-miR-296-3p   | hsa-miR-1301-3p   | hsa-miR-485-5p    | hsa-miR-221-5p   | hsa-miR-383-5p    | TLE3        |
| hsa_circ_0001204  | hsa-miR-612      | hsa-miR-657       | hsa-miR-362-3p    | hsa-miR-377-3p   | hsa-miR-136-5p    | DGCR8       |
| hsa_circ_0000517  | hsa-miR-127-5p   | hsa-miR-326       | hsa-miR-330-5p    | hsa-miR-597-3p   | hsa-miR-204-3p    | RPPH1       |
| hsa_circ_0001659  | hsa-miR-203a-5p  | hsa-miR-619-5p    | hsa-miR-146b-3p   | hsa-miR-597-3p   | hsa-miR-134-5p    | ARID1B      |
| hsa_circ_0000520  | hsa-miR-328-3p   | hsa-miR-1296-5p   | hsa-miR-146b-3p   | hsa-miR-330-5p   | hsa-miR-608       | RPPH1       |
| hsa_circ_0000273  | hsa-miR-651-3p   | hsa-miR-383-5p    | hsa-miR-340-5p    | hsa-miR-129-5p   | hsa-miR-33b-3p    | OSBPL5      |
| hsa_circ_0001903  | hsa-miR-876-3p   | hsa-miR-668-3p    | hsa-miR-302a-3p   | hsa-miR-138-5p   | hsa-miR-762       | SNORA43     |
| hsa_circ_0000519  | hsa-miR-328-3p   | hsa-miR-1296-5p   | hsa-miR-146b-3p   | hsa-miR-330-5p   | hsa-miR-671-5p    | RPPH1       |
| hsa_circ_0009577  | hsa-miR-105-5p   | hsa-miR-16-5p     | hsa-miR-424-5p    | hsa-miR-107      | hsa-miR-103a-3p   | RERE        |
| hsa_circ_0004628  | hsa-miR-21-3p    | hsa-miR-136-5p    | hsa-miR-657       | hsa-miR-593-5p   | hsa-miR-22-5p     | SCMH1       |
| hsa_circ_0000069  | hsa-miR-345-5p   | hsa-miR-29b-1-5p  | hsa-miR-34a-5p    | hsa-miR-134-3p   | hsa-miR-892a      | STIL        |
| hsa_circ_0013048  | hsa-miR-630      | hsa-miR-605-3p    | hsa-let-7g-5p     | hsa-let-7i-5p    | hsa-let-7a-5p     | LPHN2       |
| hsa_circ_0006758  | hsa-miR-324-3p   | hsa-miR-29a-5p    | hsa-miR-519d-5p   | hsa-miR-485-3p   | hsa-miR-149-5p    | UCK2        |
| hsa_circ_0006980  | hsa-miR-130b-3p  | hsa-miR-33b-3p    | hsa-miR-197-3p    | hsa-miR-550a-5p  | hsa-miR-597-3p    | ABL2        |
| hsa_circ_0015928  | hsa-miR-558      | hsa-miR-215-3p    | hsa-miR-103a-2-5p | hsa-miR-185-3p   | hsa-miR-639       | IPO9        |
| hsa_circ_0006123  | hsa-miR-125a-5p  | hsa-miR-485-5p    | hsa-miR-15a-3p    | hsa-miR-214-3p   | hsa-miR-199a-5p   | KCNH1       |
| hsa_circ_0007015  | hsa-miR-766-3p   | hsa-miR-642a-3p   | hsa-miR-758-5p    | hsa-miR-326      | hsa-miR-96-5p     | PTPN14      |
| hsa_circ_0000206  | hsa-miR-488-5p   | hsa-miR-511-5p    | hsa-miR-489-3p    | hsa-miR-449c-5p  | hsa-miR-892b      | WDR37       |
| hsa_circ_0007503  | hsa-miR-593-3p   | hsa-miR-606       | hsa-miR-520f-3p   | hsa-miR-299-3p   | hsa-miR-29b-1-5p  | WAC         |
| hsa_circ_0000231  | hsa-miR-135b-5p  | hsa-miR-135a-5p   | hsa-miR-518c-5p   | hsa-miR-552-3p   | hsa-miR-30c-1-3p  | ARHGAP12    |
| hsa_circ_00005164 | hsa-miR-302b-5p  | hsa-miR-22-5p     | hsa-miR-758-5p    | hsa-miR-494-5p   | hsa-miR-204-3p    | KAT6B       |
| hsa_circ_0005235  | hsa-miR-22-5p    | hsa-miR-758-5p    | hsa-miR-494-5p    | hsa-miR-410-5p   | hsa-miR-302b-5p   | KAT6B       |
| hsa_circ_0019803  | hsa-miR-200c-5p  | hsa-miR-377-5p    | hsa-miR-208a-5p   | hsa-miR-367-5p   | hsa-miR-599       | PCGF6       |
| hsa_circ_0021773  | hsa-let-7b-5p    | hsa-let-7i-5p     | hsa-miR-380-5p    | hsa-miR-15b-3p   | hsa-miR-182-5p    | TTC17       |
| hsa_circ_0007001  | hsa-miR-494-5p   | hsa-miR-139-3p    | hsa-miR-765       | hsa-miR-410-5p   | hsa-miR-642a-5p   | AMBRA1      |
| hsa_circ_0002989  | hsa-miR-198      | hsa-miR-212-5p    | hsa-miR-93-3p     | hsa-miR-141-5p   | hsa-miR-29a-5p    | DPP3        |
| hsa_circ_0023033  | hsa-miR-520f-3p  | hsa-miR-433-3p    | hsa-miR-93-3p     | hsa-miR-302d-3p  | hsa-miR-181a-2-3p | C11orf80    |
| hsa_circ_0023179  | hsa-miR-770-5p   | hsa-miR-588       | hsa-miR-125a-3p   | hsa-miR-557      | hsa-miR-377-5p    | LRP5        |
| hsa_circ_0023397  | hsa-miR-431-5p   | hsa-miR-106b-3p   | hsa-miR-125a-5p   | hsa-miR-125b-5p  | hsa-miR-572       | NADSYN1     |
| hsa_circ_0024758  | hsa-miR-216a-5p  | hsa-miR-595       | hsa-miR-607       | hsa-miR-545-3p   | hsa-miR-483-5p    | STT3A       |
| hsa_circ_0025388  | hsa-miR-653-5p   | hsa-miR-509-3p    | hsa-miR-584-3p    | hsa-miR-370-3p   | hsa-miR-93-3p     | A2ML1       |
| hsa_circ_0004313  | hsa-miR-198      | hsa-miR-765       | hsa-miR-619-3p    | hsa-miR-576-3p   | hsa-miR-217       | LETMD1      |
| hsa_circ_0028502  | hsa-miR-365b-5p  | hsa-miR-185-3p    | hsa-miR-214-3p    | hsa-miR-487b-5p  | hsa-miR-29a-5p    | SLC24A6     |
| hsa_circ_0008784  | hsa-miR-603      | hsa-miR-362-5p    | hsa-miR-124-3p    | hsa-miR-377-3p   | hsa-miR-670-5p    | TNFRSF19    |
| hsa_circ_0007404  | hsa-miR-139-3p   | hsa-miR-876-5p    | hsa-miR-641       | hsa-miR-502-5p   | hsa-miR-1-5p      | TMCO3       |
| hsa_circ_0031724  | hsa-miR-769-5p   | hsa-miR-211-5p    | hsa-miR-204-5p    | hsa-miR-520g-3p  | hsa-miR-144-5p    | SEC23A      |
| hsa_circ_0034044  | hsa-miR-199b-5p  | hsa-let-7a-3p     | hsa-miR-98-3p     | hsa-let-7f-1-3p  | hsa-miR-552-5p    | HERC2P3     |
| hsa_circ_0000673  | hsa-miR-33a-3p   | hsa-let-7f-2-3p   | hsa-miR-25-5p     | hsa-miR-203a-3p  | hsa-miR-1185-2-3p | RSL1D1      |
| hsa_circ_0005699  | hsa-miR-512-5p   | hsa-miR-553       | hsa-miR-489-3p    | hsa-miR-105-5p   | hsa-miR-627-3p    | C16orf62    |
| hsa_circ_0003645  | hsa-miR-1301-3p  | hsa-miR-422a      | hsa-miR-378a-3p   | hsa-miR-602      | hsa-miR-378d      | C16orf62    |
| hsa_circ_0038773  | hsa-miR-365a-5p  | hsa-miR-16-5p     | hsa-miR-15a-3p    | hsa-miR-515-5p   | hsa-miR-627-5p    | XPO6        |
| hsa_circ_0000707  | hsa-miR-136-5p   | hsa-miR-145-5p    | hsa-miR-370-3p    | hsa-miR-26b-3p   | hsa-miR-488-5p    | CBFB        |
| hsa_circ_0005615  | hsa-miR-744-5p   | hsa-miR-661       | hsa-miR-9-5p      | hsa-miR-377-5p   | hsa-miR-205-5p    | NFATC3      |
| hsa_circ_0005016  | hsa-miR-92a-2-5p | hsa-miR-449a      | hsa-miR-449b-5p   | hsa-miR-449c-5p  | hsa-miR-608       | IST1        |
| hsa_circ_0041821  | hsa-miR-18a-3p   | hsa-miR-519a-5p   | hsa-miR-519b-5p   | hsa-miR-519c-5p  | hsa-miR-518e-5p   | NEURL4      |
| hsa_circ_0041829  | hsa-miR-34a-5p   | hsa-miR-34c-5p    | hsa-miR-128-1-5p  | hsa-miR-449a     | hsa-miR-449b-5p   | NEURL4      |
| hsa_circ_0042819  | hsa-miR-302b-3p  | hsa-miR-520c-3p   | hsa-miR-520b      | hsa-miR-302a-3p  | hsa-miR-302c-3p   | SSH2        |
| hsa_circ_0005397  | hsa-miR-26b-3p   | hsa-miR-382-5p    | hsa-miR-181a-3p   | hsa-miR-330-5p   | hsa-miR-125a-3p   | RHOT1       |
| hsa_circ_0043428  | hsa-miR-143-5p   | hsa-miR-544a      | hsa-miR-105-5p    | hsa-miR-765      | hsa-miR-371a-5p   | MED1        |
| hsa_circ_0043691  | hsa-miR-761      | hsa-miR-450a-1-3p | hsa-miR-19a-5p    | hsa-miR-580-3p   | hsa-miR-544a      | NT5C3L      |
| hsa_circ_0005455  | hsa-miR-573      | hsa-miR-1264      | hsa-miR-892b      | hsa-miR-581      | hsa-miR-146a-3p   | KIAA1267    |
| hsa_circ_0007591  | hsa-miR-34a-3p   | hsa-miR-564       | hsa-miR-761       | hsa-miR-502-3p   | hsa-miR-432-3p    | NPEPPS      |
| hsa_circ_0044927  | hsa-miR-410-5p   | hsa-miR-584-5p    | hsa-miR-148a-5p   | hsa-miR-577      | hsa-miR-494-5p    | USP32       |
| hsa_circ_0045737  | hsa-miR-877-3p   | hsa-miR-365a-5p   | hsa-miR-512-5p    | hsa-miR-128-1-5p | hsa-miR-128-3p    | FBF1        |
| hsa_circ_0045905  | hsa-miR-520g-5p  | hsa-miR-412-3p    | hsa-miR-608       | hsa-miR-597-3p   | hsa-miR-127-5p    | PGS1        |
| hsa_circ_0006462  | hsa-miR-141-5p   | hsa-miR-887-5p    | hsa-miR-136-5p    | hsa-miR-671-5p   | hsa-miR-216a-5p   | NPLOC4      |
| hsa_circ_0046290  | hsa-miR-146a-3p  | hsa-miR-185-5p    | hsa-miR-593-5p    | hsa-miR-657      | hsa-miR-527       | ASPSCR1     |
| hsa_circ_0007144  | hsa-miR-29b-2-5p | hsa-miR-29b-1-5p  | hsa-miR-516b-5p   | hsa-miR-888-3p   | hsa-miR-659-3p    | PTPRM       |



|                  |                  |                   |                   |                   |                   |          |
|------------------|------------------|-------------------|-------------------|-------------------|-------------------|----------|
| hsa_circ_0047159 | hsa-miR-519c-3p  | hsa-miR-608       | hsa-miR-580-3p    | hsa-miR-638       | hsa-miR-494-5p    | C18orf8  |
| hsa_circ_0047303 | hsa-miR-149-3p   | hsa-miR-17-3p     | hsa-miR-1301-3p   | hsa-miR-509-5p    | hsa-miR-516b-5p   | ZNF521   |
| hsa_circ_0007376 | hsa-miR-571      | hsa-miR-224-5p    | hsa-miR-485-3p    | hsa-miR-485-3p    | hsa-miR-342-3p    | MAP2K2   |
| hsa_circ_0003892 | hsa-miR-608      | hsa-miR-134-3p    | hsa-miR-650       | hsa-miR-874-5p    | hsa-miR-589-5p    | LDLR     |
| hsa_circ_0049998 | hsa-miR-608      | hsa-miR-449b-3p   | hsa-miR-761       | hsa-miR-506-5p    | hsa-miR-145-5p    | PGLS     |
| hsa_circ_0050834 | hsa-miR-486-3p   | hsa-miR-328-5p    | hsa-miR-125a-3p   | hsa-miR-296-5p    | hsa-miR-873-5p    | RYR1     |
| hsa_circ_0051260 | hsa-miR-1224-5p  | hsa-miR-151a-5p   | hsa-miR-377-5p    | hsa-miR-432-3p    | hsa-miR-133a-5p   | GRIK5    |
| hsa_circ_0004302 | hsa-miR-122-5p   | hsa-miR-1301-3p   | hsa-miR-22-3p     | hsa-miR-124-3p    | hsa-miR-141-3p    | THADA    |
| hsa_circ_0055054 | hsa-miR-141-5p   | hsa-miR-298       | hsa-miR-509-3p    | hsa-miR-557       | hsa-miR-548c-5p   | GFPT1    |
| hsa_circ_0055161 | hsa-miR-502-5p   | hsa-miR-764       | hsa-miR-671-5p    | hsa-miR-615-3p    | hsa-miR-146b-3p   | CYP26B1  |
| hsa_circ_0004029 | hsa-miR-29a-5p   | hsa-miR-140-5p    | hsa-miR-203a-5p   | hsa-miR-668-5p    | hsa-miR-302c-3p   | UXS1     |
| hsa_circ_0005227 | hsa-miR-767-3p   | hsa-miR-548b-5p   | hsa-miR-573       | hsa-miR-548d-5p   | hsa-miR-548c-5p   | TANK     |
| hsa_circ_0004757 | hsa-miR-9-5p     | hsa-miR-1264      | hsa-miR-218-2-3p  | hsa-miR-342-5p    | hsa-miR-203a-5p   | SATB2    |
| hsa_circ_0008365 | hsa-miR-432-5p   | hsa-miR-103a-2-5p | hsa-miR-605-3p    | hsa-miR-130a-5p   | hsa-miR-765       | SERPINE2 |
| hsa_circ_0058753 | hsa-miR-214-5p   | hsa-miR-1301-3p   | hsa-miR-125a-5p   | hsa-miR-125b-5p   | hsa-miR-541-5p    | INPP5D   |
| hsa_circ_0004923 | hsa-miR-593-3p   | hsa-miR-342-5p    | hsa-miR-501-5p    | hsa-miR-515-5p    | hsa-miR-887-5p    | UBE2F    |
| hsa_circ_0004339 | hsa-miR-296-3p   | hsa-miR-135a-5p   | hsa-miR-135b-5p   | hsa-miR-548d-5p   | hsa-miR-570-5p    | DONSON   |
| hsa_circ_0061776 | hsa-miR-503-5p   | hsa-miR-182-5p    | hsa-miR-450a-2-3p | hsa-miR-581       | hsa-miR-455-3p    | BACE2    |
| hsa_circ_0008870 | hsa-miR-597-3p   | hsa-miR-616-3p    | hsa-miR-335-3p    | hsa-miR-185-3p    | hsa-miR-29a-5p    | MAPK1    |
| hsa_circ_0002406 | hsa-miR-150-3p   | hsa-miR-764       | hsa-miR-570-5p    | hsa-miR-657       | hsa-miR-646       | TBC1D22A |
| hsa_circ_0001280 | hsa-miR-9-3p     | hsa-miR-519e-5p   | hsa-miR-515-5p    | hsa-miR-511-5p    | hsa-miR-578       | CLASP2   |
| hsa_circ_0001292 | hsa-miR-221-5p   | hsa-miR-608       | hsa-miR-214-3p    | hsa-miR-500a-5p   | hsa-miR-591       | SCAP     |
| hsa_circ_0002023 | hsa-miR-512-3p   | hsa-miR-552-3p    | hsa-miR-494-5p    | hsa-miR-134-5p    | hsa-miR-493-3p    | CDC25A   |
| hsa_circ_0001305 | hsa-miR-10b-3p   | hsa-miR-141-5p    | hsa-miR-200c-3p   | hsa-miR-548a-3p   | hsa-miR-631       | RBM5     |
| hsa_circ_0067029 | hsa-miR-491-5p   | hsa-miR-607       | hsa-miR-373-5p    | hsa-miR-92a-2-5p  | hsa-miR-671-5p    | PDIAS1   |
| hsa_circ_0001333 | hsa-miR-500a-5p  | hsa-miR-591       | hsa-miR-7-5p      | hsa-miR-614       | hsa-miR-660-5p    | ZNF148   |
| hsa_circ_0068563 | hsa-miR-520d-3p  | hsa-miR-520a-3p   | hsa-miR-302c-3p   | hsa-miR-302a-3p   | hsa-miR-302b-3p   | XXYL1    |
| hsa_circ_0069559 | hsa-miR-215-3p   | hsa-miR-105-3p    | hsa-miR-877-3p    | hsa-miR-605-5p    | hsa-miR-615-5p    | APBB2    |
| hsa_circ_0004780 | hsa-miR-877-3p   | hsa-miR-136-3p    | hsa-miR-450b-3p   | hsa-miR-373-5p    | hsa-miR-138-5p    | LRBA     |
| hsa_circ_0003227 | hsa-miR-200b-3p  | hsa-miR-429       | hsa-miR-200c-3p   | hsa-miR-573       | hsa-miR-539-5p    | NUP155   |
| hsa_circ_0072430 | hsa-miR-26a-2-3p | hsa-miR-26a-1-3p  | hsa-miR-152-5p    | hsa-miR-20b-3p    | hsa-miR-367-5p    | PARP8    |
| hsa_circ_0072758 | hsa-miR-544a     | hsa-miR-670-3p    | hsa-miR-617       | hsa-miR-493-5p    | hsa-miR-575       | CCNB1    |
| hsa_circ_0073177 | hsa-miR-17-3p    | hsa-miR-16-5p     | hsa-miR-541-5p    | hsa-miR-15a-5p    | hsa-miR-159-5p    | MSH3     |
| hsa_circ_0005540 | hsa-miR-103a-3p  | hsa-miR-107       | hsa-miR-634       | hsa-miR-29b-3p    | hsa-miR-29a-3p    | MCTP1    |
| hsa_circ_0003528 | hsa-miR-421      | hsa-miR-181a-2-3p | hsa-miR-505-3p    | hsa-miR-429       | hsa-miR-380-5p    | SEC24A   |
| hsa_circ_0074816 | hsa-miR-21-3p    | hsa-miR-651-3p    | hsa-miR-27a-3p    | hsa-miR-138-1-3p  | hsa-miR-539-5p    | EBF1     |
| hsa_circ_0006232 | hsa-miR-370-3p   | hsa-miR-367-5p    | hsa-miR-133a-5p   | hsa-miR-138-5p    | hsa-miR-512-3p    | TRERF1   |
| hsa_circ_0077929 | hsa-miR-335-3p   | hsa-miR-587       | hsa-miR-1185-2-3p | hsa-miR-105-5p    | hsa-miR-1185-1-3p | AH11     |
| hsa_circ_0078150 | hsa-miR-506-3p   | hsa-miR-587       | hsa-miR-29a-3p    | hsa-miR-29b-3p    | hsa-miR-29c-3p    | STXBP5   |
| hsa_circ_0078346 | hsa-miR-92a-2-5p | hsa-miR-103a-2-5p | hsa-miR-412-3p    | hsa-miR-802       | hsa-miR-328-5p    | IPCEF1   |
| hsa_circ_0003958 | hsa-miR-302b-3p  | hsa-miR-107       | hsa-miR-103a-3p   | hsa-miR-33b-5p    | hsa-miR-654-5p    | HIBADH   |
| hsa_circ_0080425 | hsa-miR-24-3p    | hsa-miR-608       | hsa-miR-29a-5p    | hsa-miR-382-5p    | hsa-miR-493-5p    | WBSCHR17 |
| hsa_circ_0082564 | hsa-miR-612      | hsa-miR-330-3p    | hsa-miR-1296-5p   | hsa-miR-298       | hsa-miR-135b-3p   | CREB3L2  |
| hsa_circ_0002976 | hsa-miR-608      | hsa-miR-1224-5p   | hsa-let-7c-5p     | hsa-miR-582-3p    | hsa-miR-26a-1-3p  | UBAP2    |
| hsa_circ_0003141 | hsa-miR-34c-5p   | hsa-miR-449a      | hsa-miR-449b-5p   | hsa-miR-449c-5p   | hsa-miR-370-3p    | UBAP2    |
| hsa_circ_0087640 | hsa-miR-136-5p   | hsa-miR-103a-3p   | hsa-miR-107       | hsa-miR-581       | hsa-miR-605-3p    | CDC14B   |
| hsa_circ_0087641 | hsa-miR-136-5p   | hsa-miR-103a-3p   | hsa-miR-107       | hsa-miR-581       | hsa-miR-605-3p    | CDC14B   |
| hsa_circ_0003597 | hsa-miR-16-5p    | hsa-miR-135b-5p   | hsa-miR-424-5p    | hsa-miR-135a-5p   | hsa-miR-15a-5p    | HSDL2    |
| hsa_circ_0088128 | hsa-miR-199b-3p  | hsa-miR-199a-3p   | hsa-miR-122-5p    | hsa-miR-570-3p    | hsa-miR-574-5p    | SLC31A1  |
| hsa_circ_0088865 | hsa-miR-149-5p   | hsa-miR-9-5p      | hsa-miR-29b-1-5p  | hsa-miR-642a-5p   | hsa-miR-608       | SPN1     |
| hsa_circ_0089153 | hsa-miR-608      | hsa-miR-185-3p    | hsa-miR-653-3p    | hsa-miR-377-5p    | hsa-miR-298       | NUP214   |
| hsa_circ_0001917 | hsa-miR-218-1-3p | hsa-miR-764       | hsa-miR-338-3p    | hsa-miR-96-5p     | hsa-miR-300       | CASK     |
| hsa_circ_0006789 | hsa-miR-146a-5p  | hsa-miR-146b-5p   | hsa-miR-329-5p    | hsa-miR-30c-1-3p  | hsa-miR-30c-2-3p  | SLC25A43 |
| hsa_circ_0091934 | hsa-miR-128-2-5p | hsa-miR-128-1-5p  | hsa-miR-197-3p    | hsa-miR-20b-5p    | hsa-miR-17-5p     | FLNA     |
| hsa_circ_0092275 | hsa-miR-146a-3p  | hsa-miR-541-5p    | hsa-miR-105-5p    | hsa-miR-335-3p    | hsa-miR-378a-5p   | RPS8     |
| hsa_circ_0092374 | hsa-miR-296-3p   | hsa-miR-146b-3p   | hsa-miR-181d-3p   | hsa-miR-504-3p    | hsa-miR-328-5p    | GADD45A  |
| hsa_circ_0092312 | hsa-miR-576-5p   | hsa-miR-29a-5p    | hsa-miR-30a-3p    | hsa-miR-30e-3p    | hsa-miR-105-3p    | ANKS3    |
| hsa_circ_0092299 | hsa-miR-665      | hsa-miR-214-3p    | hsa-miR-550a-5p   | hsa-miR-550a-3-5p | hsa-miR-33b-3p    | MCM5     |
| hsa_circ_0000376 | hsa-miR-153-5p   | hsa-miR-619-5p    | hsa-miR-29b-2-5p  | hsa-miR-329-5p    | hsa-miR-635       | PRB4     |
| hsa_circ_0000589 | hsa-miR-1224-3p  | hsa-miR-432-5p    | hsa-miR-149-3p    | hsa-miR-509-5p    | hsa-miR-675-3p    | KLF13    |
| hsa_circ_0000775 | hsa-miR-671-5p   |                   |                   |                   |                   | KIF18B   |
| hsa_circ_0001525 | hsa-let-7i-5p    | hsa-let-7g-5p     | hsa-miR-619-5p    | hsa-let-7f-5p     | hsa-miR-98-5p     | C5orf56  |
| hsa_circ_0000866 | hsa-miR-450b-5p  | hsa-miR-210-5p    | hsa-miR-19b-1-5p  | hsa-miR-198       | hsa-miR-525-5p    | RPS15    |
| hsa_circ_0001455 | hsa-miR-95-5p    | hsa-miR-155-5p    | hsa-miR-526b-3p   | hsa-miR-1271-3p   | hsa-miR-519e-3p   | MARCH1   |
| hsa_circ_0000965 | hsa-miR-619-5p   | hsa-miR-130b-5p   | hsa-miR-211-5p    | hsa-miR-29b-2-5p  | hsa-miR-665       | C19orf18 |
| hsa_circ_0000033 | hsa-miR-378a-3p  | hsa-miR-378d      | hsa-miR-422a      | hsa-miR-298       | hsa-miR-328-5p    | CEP85    |
| hsa_circ_0012265 | hsa-miR-138-5p   | hsa-miR-296-3p    | hsa-miR-627-3p    | hsa-miR-214-3p    | hsa-miR-150-3p    | GPBP1L1  |
| hsa_circ_0000091 | hsa-miR-380-3p   | hsa-miR-141-5p    | hsa-miR-329-5p    | hsa-miR-21-3p     | hsa-miR-30c-5p    | RPAP2    |
| hsa_circ_0014624 | hsa-miR-423-5p   | hsa-miR-608       | hsa-miR-296-3p    | hsa-miR-877-3p    | hsa-miR-185-5p    | GON4L    |
| hsa_circ_0005758 | hsa-miR-377-5p   | hsa-miR-508-5p    | hsa-miR-552-3p    | hsa-miR-452-5p    | hsa-miR-891a-3p   | KIAA0907 |

|                   |                   |                   |                   |                   |                   |                |        |
|-------------------|-------------------|-------------------|-------------------|-------------------|-------------------|----------------|--------|
| hsa_circ_0015240  | hsa-miR-605-3p    | hsa-miR-93-3p     | hsa-miR-298       | hsa-miR-367-5p    | hsa-miR-376a-2-5p | PRRC2C         |        |
| hsa_circ_0016201  | hsa-miR-424-5p    | hsa-miR-15a-5p    | hsa-miR-10b-3p    | hsa-miR-650       | hsa-miR-15b-5p    | DSTYK          |        |
| hsa_circ_0017443  | hsa-miR-892b      | hsa-miR-138-5p    | hsa-miR-329-5p    | hsa-miR-488-5p    | hsa-miR-671-5p    | WDR37          |        |
| hsa_circ_0008523  | hsa-miR-550a-5p   | hsa-miR-550a-3-5p | hsa-miR-584-3p    | hsa-miR-431-5p    | hsa-miR-133a-3p   | DDX21          |        |
| hsa_circ_0006649  | hsa-miR-218-2-3p  | hsa-miR-574-5p    | hsa-miR-544a      | hsa-miR-1224-3p   | hsa-miR-19b-1-5p  | DLG5           |        |
| hsa_circ_0020080  | hsa-miR-26b-3p    | hsa-miR-222-5p    | hsa-let-7e-5p     | hsa-let-7a-5p     | hsa-let-7c-5p     | FAM160B1       |        |
| hsa_circ_0008915  | hsa-miR-146a-3p   | hsa-miR-137       | hsa-miR-335-3p    | hsa-miR-29a-5p    | hsa-miR-9-5p      | ZRANB1         |        |
| hsa_circ_0021506  | hsa-miR-19b-2-5p  | hsa-miR-19b-1-5p  | hsa-miR-767-3p    | hsa-miR-506-5p    | hsa-miR-550a-3p   | ANO5           |        |
| hsa_circ_0022614  | hsa-miR-15b-3p    | hsa-miR-130b-5p   | hsa-miR-412-3p    | hsa-miR-526b-5p   | hsa-miR-299-3p    | MARK2          |        |
| hsa_circ_0023255  | hsa-miR-298       |                   |                   |                   |                   | CPT1A          |        |
| hsa_circ_0007767  | hsa-miR-627-3p    | hsa-miR-539-5p    | hsa-let-7i-5p     | hsa-miR-190b      | hsa-miR-98-5p     | ALG8           |        |
| hsa_circ_0006374  | hsa-miR-526b-5p   | hsa-miR-29b-2-5p  | hsa-miR-493-3p    | hsa-miR-587       | hsa-miR-764       | ARCN1          |        |
| hsa_circ_0000375  | hsa-miR-150-5p    | hsa-miR-670-3p    | hsa-miR-1301-3p   | hsa-miR-762       | hsa-miR-185-3p    | IFFO1          |        |
| hsa_circ_0008932  | hsa-miR-455-3p    | hsa-miR-770-5p    | hsa-miR-525-5p    | hsa-miR-141-5p    | hsa-miR-223-3p    | LRP6           |        |
| hsa_circ_0025822  | hsa-miR-767-3p    | hsa-miR-103a-2-5p | hsa-miR-520e      | hsa-miR-526b-3p   | hsa-miR-373-3p    | DENND5B        |        |
| hsa_circ_0004538  | hsa-miR-612       | hsa-miR-212-5p    | hsa-miR-764       | hsa-miR-660-3p    | hsa-let-7f-2-3p   | hsa-miR-660-3p | CSRNP2 |
| hsa_circ_0026978  | hsa-miR-18a-3p    | hsa-miR-190a-5p   | hsa-miR-382-5p    | hsa-miR-450a-5p   | hsa-miR-624-3p    | CS             |        |
| hsa_circ_0028899  | hsa-miR-374a-3p   | hsa-miR-124-5p    | hsa-miR-181b-5p   | hsa-miR-181d-5p   | hsa-miR-125b-1-3p | RNF10          |        |
| hsa_circ_0029377  | hsa-miR-487b-3p   | hsa-miR-584-3p    | hsa-miR-591       | hsa-miR-593-5p    | hsa-miR-145-5p    | AACS           |        |
| hsa_circ_0004711  | hsa-miR-541-5p    | hsa-miR-876-5p    | hsa-miR-29b-2-5p  | hsa-miR-140-5p    | hsa-miR-659-5p    | KIAA0564       |        |
| hsa_circ_0031027  | hsa-miR-139-3p    | hsa-miR-143-3p    | hsa-miR-876-5p    | hsa-miR-641       | hsa-miR-619-3p    | TMCO3          |        |
| hsa_circ_0004781  | hsa-miR-338-3p    | hsa-miR-524-5p    | hsa-miR-570-3p    | hsa-miR-9-5p      | hsa-miR-520d-3p   | PCNX           |        |
| hsa_circ_0005327  | hsa-miR-324-5p    | hsa-miR-330-3p    | hsa-miR-889-5p    | hsa-miR-127-3p    | hsa-miR-320a      | ANXA2          |        |
| hsa_circ_0000676  | hsa-let-7e-5p     | hsa-miR-124-3p    | hsa-miR-877-5p    | hsa-miR-506-3p    | hsa-let-7c-5p     | ABCC1          |        |
| hsa_circ_0038111  | hsa-miR-634       | hsa-miR-511-5p    | hsa-miR-193b-3p   | hsa-miR-134-3p    | hsa-miR-580-3p    | ABCC1          |        |
| hsa_circ_0043278  | hsa-miR-103a-2-5p | hsa-miR-455-3p    | hsa-miR-302c-3p   | hsa-miR-520d-3p   | hsa-miR-302b-3p   | TADA2A         |        |
| hsa_circ_0006220  | hsa-miR-302c-3p   | hsa-miR-520d-3p   | hsa-miR-302b-3p   | hsa-miR-302d-3p   | hsa-miR-197-5p    | TADA2A         |        |
| hsa_circ_0044226  | hsa-miR-153-5p    | hsa-miR-532-5p    | hsa-miR-26a-1-3p  | hsa-miR-373-5p    | hsa-miR-503-3p    | CDC27          |        |
| hsa_circ_00045714 | hsa-miR-449c-5p   | hsa-miR-328-3p    | hsa-miR-218-1-3p  | hsa-miR-658       | hsa-miR-2113      | UNK            |        |
| hsa_circ_0000814  | hsa-miR-511-5p    | hsa-miR-764       | hsa-miR-339-5p    | hsa-miR-211-5p    | hsa-miR-204-5p    | NPLOC4         |        |
| hsa_circ_0049220  | hsa-miR-627-3p    | hsa-miR-130b-5p   | hsa-miR-1468-5p   | hsa-miR-659-3p    | hsa-miR-335-3p    | DNMT1          |        |
| hsa_circ_0049224  | hsa-miR-876-3p    | hsa-miR-450b-5p   | hsa-miR-1468-5p   | hsa-miR-1468-3p   | hsa-miR-627-3p    | DNMT1          |        |
| hsa_circ_0000977  | hsa-miR-452-5p    | hsa-miR-874-3p    | hsa-miR-218-1-3p  | hsa-miR-767-5p    | hsa-miR-218-2-3p  | NOL10          |        |
| hsa_circ_0008911  | hsa-miR-146a-3p   | hsa-let-7f-2-3p   | hsa-miR-612       | hsa-miR-1301-3p   | hsa-miR-593-3p    | ZNF512         |        |
| hsa_circ_0054021  | hsa-miR-150-3p    | hsa-miR-22-3p     | hsa-miR-627-3p    | hsa-miR-133a-5p   | hsa-miR-1301-3p   | CRIM1          |        |
| hsa_circ_0054033  | hsa-miR-515-5p    | hsa-miR-449c-3p   | hsa-miR-519e-5p   | hsa-miR-205-5p    | hsa-miR-588       | STRN           |        |
| hsa_circ_0055630  | hsa-miR-511-5p    | hsa-miR-485-5p    | hsa-miR-574-5p    | hsa-miR-539-5p    | hsa-miR-198       | LOC285033      |        |
| hsa_circ_0009020  | hsa-let-7c-3p     | hsa-miR-224-5p    | hsa-miR-1271-3p   | hsa-miR-335-3p    | hsa-miR-27a-3p    | SEPT10         |        |
| hsa_circ_0057582  | hsa-miR-152-5p    | hsa-miR-96-3p     | hsa-miR-380-5p    | hsa-miR-365a-5p   | hsa-miR-103a-3p   | HECW2          |        |
| hsa_circ_0058497  | hsa-miR-103a-2-5p | hsa-miR-22-5p     | hsa-miR-26b-3p    | hsa-miR-609       | hsa-miR-525-5p    | RHBDD1         |        |
| hsa_circ_0005265  | hsa-miR-103a-2-5p | hsa-miR-152-5p    | hsa-miR-582-3p    | hsa-miR-26b-3p    | hsa-miR-140-5p    | PTPRA          |        |
| hsa_circ_0002113  | hsa-miR-130a-5p   | hsa-miR-516b-5p   | hsa-miR-518c-5p   | hsa-miR-367-5p    | hsa-miR-671-5p    | IFNGR2         |        |
| hsa_circ_0008252  | hsa-miR-145-5p    | hsa-miR-876-3p    | hsa-miR-875-3p    | hsa-miR-671-3p    | hsa-miR-630       | UBE2L3         |        |
| hsa_circ_0008044  | hsa-miR-656-5p    | hsa-miR-30b-3p    | hsa-miR-432-5p    | hsa-miR-93-3p     | hsa-miR-494-5p    | EWSR1          |        |
| hsa_circ_0064019  | hsa-miR-650       | hsa-miR-539-5p    | hsa-miR-132-5p    | hsa-miR-585-3p    | hsa-miR-1-5p      | RABL2B         |        |
| hsa_circ_0064644  | hsa-miR-330-5p    | hsa-miR-15a-5p    | hsa-miR-429       | hsa-miR-424-5p    | hsa-miR-200b-3p   | RBMS3          |        |
| hsa_circ_0065173  | hsa-miR-627-3p    | hsa-miR-544a      | hsa-miR-130b-5p   | hsa-miR-22-5p     | hsa-miR-335-3p    | SETD3          |        |
| hsa_circ_0065964  | hsa-miR-497-5p    | hsa-miR-424-5p    | hsa-miR-15b-5p    | hsa-miR-15a-5p    | hsa-miR-214-3p    | ACY1           |        |
| hsa_circ_0067492  | hsa-miR-484       | hsa-miR-212-5p    | hsa-miR-331-3p    | hsa-miR-891a-3p   | hsa-miR-624-5p    | IL20RB         |        |
| hsa_circ_0005873  | hsa-miR-544a      | hsa-miR-624-3p    | hsa-miR-141-3p    | hsa-miR-758-5p    | hsa-miR-92b-5p    | LRCH3          |        |
| hsa_circ_0070245  | hsa-miR-622       | hsa-miR-103a-2-5p | hsa-miR-766-5p    | hsa-miR-103a-3p   | hsa-miR-107       | SEC31A         |        |
| hsa_circ_0070421  | hsa-miR-1264      | hsa-miR-30c-2-3p  | hsa-miR-30c-1-3p  | hsa-miR-363-5p    | hsa-miR-513a-3p   | HERC5          |        |
| hsa_circ_0007380  | hsa-miR-450b-3p   | hsa-miR-708-3p    | hsa-miR-644a      | hsa-miR-103a-2-5p | hsa-miR-10b-3p    | NSUN2          |        |
| hsa_circ_0072279  | hsa-miR-665       | hsa-miR-874-5p    | hsa-miR-188-3p    | hsa-miR-29b-2-5p  | hsa-miR-1271-3p   | NUP155         |        |
| hsa_circ_0002512  | hsa-miR-607       | hsa-miR-589-3p    | hsa-miR-605-5p    | hsa-miR-550a-5p   | hsa-miR-550a-3-5p | DEPDC1B        |        |
| hsa_circ_0073930  | hsa-miR-455-3p    | hsa-miR-29b-2-5p  | hsa-miR-9-5p      | hsa-miR-216a-3p   | hsa-miR-493-3p    | VDAC1          |        |
| hsa_circ_0074323  | hsa-miR-493-5p    | hsa-miR-524-5p    | hsa-miR-498       | hsa-miR-218-2-3p  | hsa-miR-296-3p    | DIAPH1         |        |
| hsa_circ_0075410  | hsa-miR-221-5p    | hsa-miR-153-5p    | hsa-miR-592       | hsa-miR-597-5p    | hsa-miR-190b      | DUSP22         |        |
| hsa_circ_0003738  | hsa-miR-122-3p    | hsa-miR-490-5p    | hsa-miR-92a-2-5p  | hsa-miR-562       | hsa-miR-302c-3p   | LRRC16A        |        |
| hsa_circ_0004712  | hsa-miR-455-3p    | hsa-let-7g-5p     | hsa-miR-876-3p    | hsa-miR-661       | hsa-miR-323a-5p   | PDE7B          |        |
| hsa_circ_0078223  | hsa-miR-576-5p    | hsa-miR-887-5p    | hsa-miR-892a      | hsa-miR-425-5p    | hsa-miR-138-5p    | LATS1          |        |
| hsa_circ_0007317  | hsa-miR-22-5p     | hsa-miR-498       | hsa-miR-193a-5p   | hsa-miR-493-3p    | hsa-miR-148a-3p   | IPCEF1         |        |
| hsa_circ_0078616  | hsa-miR-563       | hsa-miR-10b-3p    | hsa-miR-892b      | hsa-miR-1264      | hsa-miR-130a-5p   | MAP3K4         |        |
| hsa_circ_0078619  | hsa-miR-136-5p    | hsa-miR-1264      | hsa-miR-29a-5p    | hsa-miR-520f-3p   | hsa-miR-339-5p    | MAP3K4         |        |
| hsa_circ_0079440  | hsa-miR-670-3p    | hsa-miR-495-5p    | hsa-miR-103a-2-5p | hsa-miR-623       | hsa-miR-20a-3p    | PHF14          |        |
| hsa_circ_0079619  | hsa-miR-541-5p    | hsa-miR-486-3p    | hsa-miR-888-3p    | hsa-miR-140-5p    | hsa-miR-623       | MPP6           |        |
| hsa_circ_0082314  | hsa-miR-372-3p    | hsa-miR-302d-3p   | hsa-miR-373-3p    | hsa-miR-302a-3p   | hsa-miR-302c-3p   | NRF1           |        |
| hsa_circ_0008555  | hsa-miR-670-3p    | hsa-miR-33a-5p    | hsa-miR-33b-5p    | hsa-miR-204-3p    | hsa-miR-148b-5p   | VPS37A         |        |
| hsa_circ_0008303  | hsa-miR-665       | hsa-miR-134-3p    | hsa-miR-193a-5p   | hsa-miR-422a      | hsa-miR-491-3p    | PTDSS1         |        |
| hsa_circ_0004380  | hsa-miR-34b-5p    | hsa-miR-20a-3p    | hsa-miR-217       | hsa-miR-449c-5p   | hsa-miR-770-5p    | TRAPPC9        |        |

|                  |                 |                   |                 |                 |                   |          |
|------------------|-----------------|-------------------|-----------------|-----------------|-------------------|----------|
| hsa_circ_0086686 | hsa-miR-512-3p  | hsa-miR-370-3p    | hsa-miR-504-3p  | hsa-miR-193a-3p | hsa-miR-193b-3p   | UBAP2    |
| hsa_circ_0087300 | hsa-miR-185-3p  | hsa-miR-762       | hsa-miR-9-5p    | hsa-miR-345-3p  | hsa-miR-103a-2-5p | TLE4     |
| hsa_circ_0087305 | hsa-miR-892b    | hsa-miR-762       | hsa-miR-214-5p  | hsa-miR-30b-3p  | hsa-miR-29b-1-5p  | TLE4     |
| hsa_circ_0088494 | hsa-miR-302d-3p | hsa-miR-103a-2-5p | hsa-miR-302a-3p | hsa-miR-302b-3p | hsa-miR-302c-3p   | NEK6     |
| hsa_circ_0008240 | hsa-miR-627-3p  | hsa-miR-762       | hsa-miR-767-5p  | hsa-miR-423-3p  | hsa-miR-449b-5p   | FAM125B  |
| hsa_circ_0092282 | hsa-miR-532-5p  | hsa-miR-766-3p    | hsa-miR-490-5p  | hsa-miR-384     | hsa-miR-30a-3p    | SNHG12   |
| hsa_circ_0092338 | hsa-miR-324-5p  | hsa-miR-588       | hsa-miR-140-5p  | hsa-miR-216a-3p | hsa-miR-299-3p    | NINL     |
| hsa_circ_0092276 | hsa-miR-149-5p  | hsa-miR-892b      | hsa-miR-431-3p  | hsa-miR-516a-3p | hsa-miR-516b-3p   | NISCH    |
| hsa_circ_0092341 | hsa-miR-328-3p  | hsa-miR-212-5p    | hsa-miR-135b-5p | hsa-miR-548d-3p | hsa-miR-135a-5p   | C6orf132 |
| hsa_circ_0092310 | hsa-miR-19a-5p  | hsa-miR-328-3p    | hsa-miR-497-3p  | hsa-miR-1301-3p | hsa-miR-584-3p    | TJAP1    |
| hsa_circ_0092346 | hsa-miR-766-3p  | hsa-miR-671-5p    | hsa-miR-524-5p  | hsa-miR-155-5p  | hsa-miR-198       | RPS4X    |

---

**Table S6. Nucleotide sequences used in this study**

| <b>Primer pairs for qPCR/RT-PCR</b>   | 5' → 3'                                   |
|---------------------------------------|-------------------------------------------|
| hsa_circ_0043278, circTADA2A-E5/E6- F | TGTGCACCAAGACCAAGGAG                      |
| hsa_circ_0043278, circTADA2A-E5/E6- R | AGGAAAATCTGAAGTAGTGA                      |
| hsa_circ_0000977, circNOL10-F         | TGCTTCTGACGGCCAATGAA                      |
| hsa_circ_0000977, circNOL10-R         | AACAGGCCAACTCTGTTTCGA                     |
| hsa_circ_0006220, circTADA2A- E6-F    | GCCATTCCATTTCACTGCAG                      |
| hsa_circ_0006220, circTADA2A-E6- R    | AGGTTCCAGCAGGGTAGAT                       |
| hsa_circ_0007380, circNSUN2- F        | CGTGCGGCCTCATCATAAGG                      |
| hsa_circ_0007380, circNSUN2-R         | TGACGACTAATATTTCCAGAT                     |
| hsa_circ_0004538, circCSRNP2- F       | TTCTGCGTGAGCACCTGAAG                      |
| hsa_circ_0004538, circCSRNP2- R       | GCTTCTGCCGCTTCAGGATG                      |
| hsa_circ_0008240, circFAM125B-F       | CCAACCTCCCAGGACCAGT                       |
| hsa_circ_0008240, circFAM125B-R       | CTGTGCAACTACGTCATAGC                      |
| hsa_circ_0044226, circCDC27- F        | AGAATTGGACAAAGCATTAG                      |
| hsa_circ_0044226, circCDC27-R         | TGGTTGTGGAGCTGTCACTA                      |
| hsa_circ_0000676, circABCC1- F        | CTAGCCATCCTGAGATCCAA                      |
| hsa_circ_0000676, circABCC1- R        | GAGGACCGTGTTCTGAAAGCA                     |
| human-ACTB-F                          | CATGTACGTTGCTATCCAGGC                     |
| human-ACTB-R                          | CTCCTTAATGTCACGCACGAT                     |
| circTADA2A-E6-F (hRLuc)               | CCGCTCGAGGCAGGATGTAGCCAATCAAAT            |
| circTADA2A-E6-R (hRLuc)               | ATAAGAATGCGGCCGCAGTGAAATGGAATGGCTGT<br>GT |
| miR-203a-3p-F                         | ATGGTTCGTGGGGTGAAATGTTTAGG                |
| miR-203a-3p-R                         | GTGCAGGGTCCGAGGT                          |
| U6-F                                  | CTCGCTTCGGCAGCACA                         |
| U6-R                                  | AACGCTTCACGAATTTGCGT                      |
| <b>siRNA</b>                          | splicing junction                         |
| hsa_circ_0006220 circTADA2A siRNA #1  | CCAUUUCACUGCAGGAUGUdTdT                   |
| hsa_circ_0006220 circTADA2A siRNA #2  | CACUGCAGGAUGUAGCCAAdTdT                   |
| hsa_circ_0006220 circTADA2A siRNA #3  | UUCAUUUCACUGCAGGAUdTdT                    |
| Control siRNA                         | UUCUCCGAACGUGUCACGUTT                     |
| SOCS3 siRNA                           | CCAAGAACCUGCGCAUCCAdTdT                   |
| Control miRNA                         | CAGUACUUUUUGUGUAGUACAA                    |
| miR-203a-3p inhibitor                 | CUAGUGGUCCUAAACAUUUCAC                    |
| miR-203a-3p mimic                     | GUGAAAUGUUUAGGACCACUAG                    |

**Fish probe**

Cy3-labeled circTADA2A-E6 probe

CATCCTGCAGTGAAATGGAATGGC

FITC-labeled miR-203a-3p probe

CTAGTGGTCCTAAACATTTAC
